# Supplementary material
Source: PubMed Central journal article supplement (PMC152285)

7.3 CG11892  
6.7 ImpE2  
6.6 Hsp27  
6.6 Tsp42Ep  
5.1 CG9021  
4.3 CG5171  
4.1 CG8502  
3.5 CG2471  
3.4 CG11459  
3.2 Pu  
3.0 Hsp26  
2.9 CG10374  
2.9 CG5538  
2.7 CG14207  
2.7 CG9664  
2.7 CG4408  
2.7 CG11089  
2.7 CG2767  
2.7 fax  
2.7 CG8888  
2.6 Pen  
2.6 yin  
2.6 CG6891  
2.5 CG4454  
2.5 BG:DS09218.3  
2.5 Orct  
2.5 Sply  
2.5 CG7342  
2.4 Cyt-c-d  
2.3 CG8054  
2.3 CG15309  
2.3 Lcp1  
2.3 HmgD  
2.3 CG1236  
2.3 icin  
2.3 anon-EST:Schwartz-1  
2.2 CG8040  
2.2 CG10513  
2.2 Uch-L3  
2.2 CG10419  
2.2 MESR6  
2.2 P11  
2.2 shg  
2.2 Lac  
2.2 Gs2  
2.1 CG6282  
2.1 cutlet  
2.1 Lsplgamma  
2.1 CG6234  
2.1 CG5202

2.1 CG11652  
2.1 CBP  
2.1 CG8489  
2.1 Ama  
2.1 CG12699  
2.1 BG:DS00797.7  
2.1 mRps18c  
2.0 Df31  
2.0 p120ctn  
2.0 CG1837  
2.0 CG6372  
2.0 CG4390  
2.0 Ho  
1.9 CG9628  
1.9 rtet  
1.9 Rip75B  
1.9 CG8600  
1.9 CG9213  
1.9 Prosalpha6  
1.9 CG12000  
1.9 CG3376  
1.9 BEST:CK01577  
1.9 mus209  
1.8 CG3829  
1.8 CG2031  
1.8 CG6180  
1.8 CG6287  
1.8 Hsp23  
1.8 CG7255  
1.8 CG11595  
1.8 CG17323  
1.8 CycA  
1.8 CG12366  
1.8 CG10561  
1.8 kal-1  
1.8 mei-S332  
1.8 CG4502  
1.8 CG12139  
1.8 CG2446  
1.8 CG2947  
1.8 BG:DS09217.1  
1.8 CG15512  
1.8 CG10074  
1.8 ash2  
1.8 CG5177  
1.8 CG4837  
1.8 BG:DS03192.4  
1.8 chico  
1.8 Trxr-1  
1.8 Gpdc

1.8 CG3174  
1.8 CG2196  
1.8 CG13805  
1.8 CG5599  
1.8 CG5335  
1.8 Doa  
1.8 kraken  
1.8 BEST:LD30049  
1.8 l(2)44DEa  
1.8 Gdh  
1.8 CG12264  
1.8 Bc  
1.9 mre11  
1.9 CG18180  
1.9 CG4769  
1.9 CG16850  
1.9 CG5037  
1.9 Cyp12c1  
1.9 CG3987  
1.9 Hn  
1.9 CG15234  
1.9 EG:87B1.3  
1.9 CG12123  
1.9 CG15818  
1.9 CG10599  
1.9 CG7635  
1.9 CG15093  
1.9 Ady43A  
1.9 CG8776  
2.0 CG7529  
2.0 Dhh1  
2.0 CG9005  
2.0 CG11796  
2.0 CG7224  
2.0 vri  
2.0 CG1733  
2.0 drm  
2.0 CG18656  
2.0 CG11887  
2.1 Msr-110  
2.1 Dpl  
2.1 CG6271  
2.1 CG15106  
2.1 CG3556  
2.1 Eflalpha48D  
2.1 CG9682  
2.1 fat-spondin  
2.1 CG4233  
2.2 CG7549  
2.2 CG10964

2.2 CG9898  
2.2 CG7158  
2.2 CG7720  
2.2 BcDNA:GH02431  
2.2 Cyp6a20  
2.3 CG6183  
2.3 CG10872  
2.3 Cyp28d1  
2.3 CG3106  
2.3 CG1105  
2.3 Mlc2  
2.4 CG8588  
2.4 Mippl  
2.4 Fst  
2.4 BEST:GH10831  
2.5 EG:BACN32G11.6  
2.5 BEST:GH02216  
2.5 CG3775  
2.5 vanin-like  
2.5 up  
2.5 CG3168  
2.5 CG14290  
2.5 CG17836  
2.5 BcDNA:LD32788  
2.5 CG7252  
2.5 CG5966  
2.5 CG13333  
2.5 CG17533  
2.6 CG2233  
2.6 Argk  
2.6 CG6933  
2.6 JhI-26  
2.6 CG8773  
2.6 CG7705  
2.6 yip7  
2.6 Myo61F  
2.6 BcDNA:GH06717  
2.6 aay  
2.6 CG10531  
2.6 CG8775  
2.7 CG1809  
2.7 Ag5r  
2.7 msn  
2.7 Tsp42Eb  
2.7 CG9509  
2.7 EG:171D11.1  
2.7 CG10725  
2.7 BG:DS00941.13  
2.7 CG5770  
2.7 jing

2.7 Fas2  
2.8 Cyp28a5  
2.8 CG6839  
2.8 CG8774  
2.8 Cyp4g1  
2.8 CG13868  
2.8 desat1  
2.9 Yp2  
2.9 alpha-Est7  
3.0 CG10472  
3.0 CG7920  
3.0 Adh  
3.0 CG7298  
3.1 Jafracl  
3.1 CG6296  
3.2 mfas  
3.2 CG4653  
3.2 Chit  
3.2 CG18522  
3.3 Men  
3.4 CG10433  
3.5 Amy-p  
3.6 BG:DS00941.15  
3.6 CG6640  
3.8 CG5932  
4.0 CG5839  
4.0 CG6981  
4.0 Cyt-b5-r  
4.2 glob1  
4.7 CG3868  
5.3 CG7874  
5.5 Cyp6a8  
5.9 CG5150  
6.2 BcDNA:SD02026  
8.4 CG13095

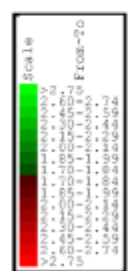

Supplement: pnas_0538075100_3.pdf [file pnas_0538075100_3.pdf]
